# Supplementary material for: Treating nightmares in posttraumatic stress disorder with dronabinol: study protocol of a multicenter randomized controlled study (THC PTSD-trial)
Source: Springer Nature journal article supplement (doi:10.1186/s12888-023-04818-5), 2023-05-05

29. JAN. 2020

Verteilt

Landesamt für Gesundheit und Soziales Berlin  
Postfach 310929, 10639 Berlin (Postanschrift)

Koordinierungszentrum für Klinische Studien der Charité  
Dr. Uwe Behrens  
Augustenburger Platz 1  
13353 Berlin

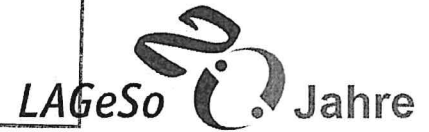

Geschäftszeichen (bitte immer angeben)  
19/0384 - IV E 11

Dienstgebäude:  
Turmstraße 21, 10559 Berlin

vorab per Fax: 030-450-553 937

Bearbeiter/in:  
Urs Schulte  
Zimmer: A.06.29

Telefon: 030902291226

Telefax: 03090283383

E-Mailadresse:  
urs.schulte@lageso.berlin.de  
(nicht für Dokumente mit elektronischer Signatur)

Datum: 22.01.2020

**Klinische Prüfung eines Arzneimittels:** Antrag auf zustimmende Bewertung einer klinischen Prüfung, § 42 Abs. 1 Arzneimittelgesetz (AMG), § 7 Abs. 1 Verordnung über die Anwendung der Guten Klinischen Praxis bei der Durchführung von klinischen Prüfungen von Arzneimitteln am Menschen (GCP-V).

|                                          |                                                                                                                      |
|------------------------------------------|----------------------------------------------------------------------------------------------------------------------|
| Antrag vom:                              | 18.10.2019                                                                                                           |
| Eingang am:                              | 22.10.2019                                                                                                           |
| Sponsor:                                 | Charité - Universitätsmedizin Berlin                                                                                 |
| Bevollmächtigter Vertreter des Sponsors: | Koordinierungszentrum für Klinische Studien der Charité                                                              |
| Leiter der klinischen Prüfung:           | Dr. Prof. Dr. Stefan Röpke, 12200 Berlin                                                                             |
| EudraCT-Nummer:                          | 2019-002211-25                                                                                                       |
| Prüfplancode:                            | THC-PTSD-Trial                                                                                                       |
| Titel der klinischen Prüfung:            | Treating Nightmares in Posttraumatic Stress Disorder with Dronabinol: A Randomized Controlled Study (THC PTSD-trial) |

Nachrichtlich an:

Bundesinstitut f. Arzneimittel u. Medizinprodukte

Verkehrsverbindungen:

Eingang Turmstr. 21  
U 9 Turmstraße;  
Bus M 27, 245, TXL  
Haltestelle: U-Turmstraße;  
Bus 101, 123, 187  
Haltestelle: Turmstr./  
Lübecker Str.

Eingang Birkenstr. 62  
U 9 Birkenstraße  
Kein Aufzug vorhanden  
Bus M 27, Haltestelle  
Havelberger Str.;  
Bus 123, Haltestelle:  
Birkenstr. / Rathenower Str.

Zahlungen bitte  
bargeldlos an die  
Landeshauptkasse  
Klosterstr. 47  
10179 Berlin

Geldinstitut  
Postbank Berlin  
Landesbank Berlin  
Deutsche Bundesbank  
Filiale Berlin

IBAN  
DE47 1001 0010 0000 0581 00  
DE25 1005 0000 0990 0076 00  
DE53 1000 0000 0010 0015 20

Sehr geehrte Frau Bölscher,

hiermit bestätige ich den Eingang Ihres Schreibens vom 02.01.2020, eingegangen am 07.01.2020, mit dem Sie nachfolgend genannte Unterlagen eingereicht haben:

|           |                                                                                                 |
|-----------|-------------------------------------------------------------------------------------------------|
| Anlage 1  | "Durchgeführte Bearbeitungen"                                                                   |
| Anlage 2  | Protocol Version 1.1 vom 19.12.2019, a) clean, b) tracked changes                               |
| Anlage 3  | Deutsche Synopse Version 1.1 vom 19.12.2019, a) clean, b) tracked changes                       |
| Anlage 4  | Patienteninformation Version 1.1 vom 19.12.2019, a) clean, b) tracked changes                   |
| Anlage 5  | Instruktionen zur Medikamenteneinnahme Version 1.1 vom 19.12.2019, a) clean, b) tracked changes |
| Anlage 6  | Begleituntersuchung Sexualfunktion Version 1.1 vom 20.12.2019, a) clean, b) tracked changes     |
| Anlage 7  | Begleituntersuchung Nacherhebung Version 1.0 vom 19.12.2019                                     |
| Anlage 8  | Begleituntersuchung virtuelle Realität Version 1.1 vom 03.12.2019                               |
| Anlage 9  | Versicherungsbestätigung                                                                        |
| Anlage 10 | Ausdrucke/Dateien des eCRF, Datensatztabelle (Excel) nur auf CD                                 |
| Anlage 11 | Nachrechnung für Prüfzentrum Hamburg, Dr. Biedermann: aktualisierte Angaben zur Prüfstelle      |

Die mit der zustimmenden Bewertung vom 21.11.2019 verbundenen Bedingungen sind damit eingetreten.

Ich danke für die Berücksichtigung der erteilten Hinweise.

**Ich bitte Sie um Mitteilung des kalendermäßigen Beginns der o.g. klinischen Prüfung in Deutschland.**

Für die Durchführung des o.g. Vorhabens wünsche ich Ihnen viel Erfolg.

Mit freundlichen Grüßen



Dr. med. Katrin Bräutigam  
Stellv. Vorsitzende des Ausschusses 1  
der Ethik-Kommission des Landes Berlin

# Sendebericht

MFP

ECOSYS M2640idw

Firmware-Version 2S5\_2000.001.702 2017.12.08

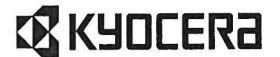

VCN7909083

28/01/2020 13:44

[2S0\_1000.002.002] [2S0\_1100.001.003] [2S5\_7000.001.601]

Auftr.Nr.: 004511

Gesamtzeit: 0°00'10"

Seite: 001

## Vollendet

Original.: doc00451120200128134324

28/01/2020 12:11 004921143022279

REKNO-ETHIK

3. 037 03

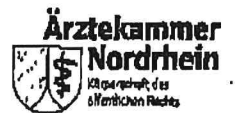

Seite 3 von 5  
2020017

**Anlage 1 zur Eingangsbestätigung**

**Bitte diese Seite innerhalb von 3 Tagen zurückfaxen:**

**FAX-Nummer 0211 / 4302-2279**

## **KOSTENÜBERNAHMEERKLÄRUNG**

**für die Bewertung von Studienunterlagen durch die Ethik-Kommission der  
Ärztekammer Nordrhein gemäß der gültigen Gebührenordnung**

| Nr. | Datum/Zeit     | Ziel          | Zeit     | Typ | Ergebnis | Auflösung/ECM      |
|-----|----------------|---------------|----------|-----|----------|--------------------|
| 001 | 28/01/20 13:44 | 0021143022279 | 0°00'10" | FAX | OK       | 200x100 Normal/Ein |

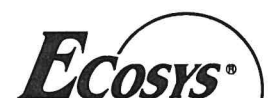

Supplement: MOESM3 [file 25324378]
